# Supplementary material for: Whey Cheeses Containing Probiotic and Bioprotective Cultures Produced with Ultrafiltrated Cow’s Whey
Source: MDPI journal article supplement (doi:10.3390/foods13081214), 2024-04-16
Supplement: s1 [file s1]

**Table S1.** Physicochemical parameters of whey cheese samples. Average values and standard deviation ( $\pm$ ).

| DRY MATTER          |                        |                        |                        |
|---------------------|------------------------|------------------------|------------------------|
| Storage time (days) | C                      | LA5                    | LA5FQ4                 |
| 1                   | 16.83 $\pm$ 0.36 a,A   | 19.50 $\pm$ 0.77 a,B   | 18.82 $\pm$ 0.28 a,b,B |
| 7                   | 18.66 $\pm$ 0.59 b,A   | 19.90 $\pm$ 0.25 a,B   | 20.61 $\pm$ 0.34 b,B   |
| 14                  | 19.23 $\pm$ 0.33 b,A   | 21.46 $\pm$ 3.10 a,A   | 20.04 $\pm$ 1.82 a,b,A |
| 21                  | 18.11 $\pm$ 0.36 b,A   | 19.44 $\pm$ 0.43 a,B   | 19.25 $\pm$ 0.52 a,b,B |
| 28                  | 16.07 $\pm$ 0.51 a,A   | 19.04 $\pm$ 1.42 a,B   | 18.10 $\pm$ 0.71 a,A,B |
| aw                  |                        |                        |                        |
| Storage time (days) | C                      | LA5                    | LA5FQ4                 |
| 1                   | 0.934 $\pm$ 0.00 a,A   | 0.936 $\pm$ 0.00 a,b,A | 0.943 $\pm$ 0.00 b,c,B |
| 7                   | 0.937 $\pm$ 0.00 c,A   | 0.944 $\pm$ 0.00 c,A,B | 0.946 $\pm$ 0.00 c,B   |
| 14                  | 0.938 $\pm$ 0.00 c,A   | 0.939 $\pm$ 0.00 b,c,A | 0.940 $\pm$ 0.00 b,A   |
| 21                  | 0.937 $\pm$ 0.00 b,c,A | 0.938 $\pm$ 0.00 b,c,A | 0.939 $\pm$ 0.00 b,A   |
| 28                  | 0.935 $\pm$ 0.00 a,b,B | 0.932 $\pm$ 0.00 a,A   | 0.933 $\pm$ 0.00 a,A   |
| pH                  |                        |                        |                        |
| Storage time (days) | C                      | LA5                    | LA5FQ4                 |
| 1                   | 6.67 $\pm$ 0.06 b,C    | 5.27 $\pm$ 0.06 a,b,A  | 5.80 $\pm$ 0.10 d,B    |
| 7                   | 6.63 $\pm$ 0.06 b,B    | 5.37 $\pm$ 0.06 b,c,A  | 5.43 $\pm$ 0.06 a,b,A  |
| 14                  | 6.93 $\pm$ 0.06 c,C    | 5.47 $\pm$ 0.06 c,A    | 5.67 $\pm$ 0.06 c,d,B  |
| 21                  | 6.53 $\pm$ 0.15 b,B    | 5.27 $\pm$ 0.06 b,A    | 5.23 $\pm$ 0.06 a,b,A  |
| 28                  | 6.17 $\pm$ 0.12 a,C    | 5.07 $\pm$ 0.06 a,A    | 5.47 $\pm$ 0.12 b,c,B  |
| TITRATABLE ACIDITY  |                        |                        |                        |
| Storage time (days) | C                      | LA5                    | LA5FQ4                 |
| 1                   | 0.035 $\pm$ 0.01 a,A   | 0.208 $\pm$ 0.01 a,C   | 0.164 $\pm$ 0.01 a,B   |
| 7                   | 0.089 $\pm$ 0.00 b,A   | 0.431 $\pm$ 0.01 c,C   | 0.399 $\pm$ 0.01 d,B   |
| 14                  | 0.100 $\pm$ 0.01 b,A   | 0.570 $\pm$ 0.02 d,C   | 0.246 $\pm$ 0.02 b,B   |
| 21                  | 0.101 $\pm$ 0.00 b,A   | 0.378 $\pm$ 0.00 b,C   | 0.261 $\pm$ 0.01 b,B   |
| 28                  | 0.176 $\pm$ 0.01 c,A   | 0.451 $\pm$ 0.01 c,C   | 0.332 $\pm$ 0.02 c,B   |

Different superscript letters (a,b,c,d) indicate differences for the same product in different ripening days. Superscript capital letters (A,B,C) indicate differences between products at the same ripening day.

**Table S2.** CIEL\*a\*b\* parameters of whey cheese samples. Average values and standard deviation ( $\pm$ ).

| L*                  |                        |                        |                        |
|---------------------|------------------------|------------------------|------------------------|
| Storage time (days) | C                      | LA5                    | LA5FQ4                 |
| 1                   | 86.90 $\pm$ 1.49 a,b,B | 87.23 $\pm$ 1.79 a,B   | 82.00 $\pm$ 0.35 a,A   |
| 7                   | 82.17 $\pm$ 2.07 a,A   | 87.10 $\pm$ 3.20 a,A,B | 91.17 $\pm$ 3.20 b,B   |
| 14                  | 83.90 $\pm$ 3.56 a,b,A | 87.00 $\pm$ 2.76 a,A   | 87.13 $\pm$ 2.37 a,b,A |
| 21                  | 88.00 $\pm$ 2.82 a,b,A | 86.70 $\pm$ 0.61 a,A   | 87.90 $\pm$ 2.51 a,b,A |
| 28                  | 89.83 $\pm$ 0.51 b,B   | 90.43 $\pm$ 1.85 a,B   | 84.23 $\pm$ 2.29 a,A   |
| a*                  |                        |                        |                        |
| Storage time (days) | C                      | LA5                    | LA5FQ4                 |
| 1                   | -3.43 $\pm$ 0.21 a,B   | -2.57 $\pm$ 0.23 a,A   | -2.8 $\pm$ 0.26 a,A    |

|                     |                              |                               |                             |
|---------------------|------------------------------|-------------------------------|-----------------------------|
| 7                   | -3.07 ± 0.32 <sub>a,A</sub>  | -3.50 ± 0.40 <sub>b,c,A</sub> | -2.93 ± 0.06 <sub>a,A</sub> |
| 14                  | -3.20 ± 0.62 <sub>a,A</sub>  | -3.77 ± 0.15 <sub>c,A</sub>   | -3.13 ± 0.31 <sub>a,A</sub> |
| 21                  | -2.43 ± 0.06 <sub>a,A</sub>  | -2.57 ± 0.45 <sub>a,A</sub>   | -2.70 ± 0.17 <sub>a,A</sub> |
| 28                  | -2.70 ± 0.40 <sub>a,A</sub>  | -2.63 ± 0.32 <sub>a,b,A</sub> | -3.10 ± 0.17 <sub>a,A</sub> |
| b*                  |                              |                               |                             |
| Storage time (days) | C                            | LA5                           | LA5FQ4                      |
| 1                   | 6.27 ± 0.55 <sub>a,A</sub>   | 5.80 ± 0.20 <sub>a,A</sub>    | 6.53 ± 1.17 <sub>a,A</sub>  |
| 7                   | 7.83 ± 0.06 <sub>a,A,B</sub> | 8.87 ± 0.80 <sub>c,B</sub>    | 7.50 ± 0.40 <sub>a,A</sub>  |
| 14                  | 8.13 ± 1.95 <sub>a,A</sub>   | 8.80 ± 0.30 <sub>c,A</sub>    | 6.87 ± 0.45 <sub>a,A</sub>  |
| 21                  | 6.77 ± 0.29 <sub>a,A</sub>   | 6.97 ± 0.51 <sub>a,b,A</sub>  | 6.77 ± 0.64 <sub>a,A</sub>  |
| 28                  | 6.17 ± 0.15 <sub>a,A</sub>   | 7.30 ± 0.26 <sub>b,B</sub>    | 7.40 ± 0.52 <sub>a,B</sub>  |

Different superscript letters (a,b,c) indicate differences for the same product in different ripening days. Superscript capital letters (A,B) indicate differences between products at the same ripening day.

**Table S3.** Microbiological counts of whey cheese samples. Average values and standard deviation (±).

| LACTOCOCCUS         |                              |                            |                                |
|---------------------|------------------------------|----------------------------|--------------------------------|
| Storage time (days) | C                            | LA5                        | LA5FQ4                         |
| 1                   | 6.46 ± 0.14 <sub>a,A</sub>   | 8.18 ± 0.10 <sub>a,B</sub> | 8.81 ± 0.03 <sub>b,C</sub>     |
| 7                   | 7.90 ± 0.03 <sub>b,A</sub>   | 8.53 ± 0.21 <sub>a,B</sub> | 8.08 ± 0.11 <sub>a,A</sub>     |
| 14                  | 8.51 ± 0.34 <sub>c,A</sub>   | 9.47 ± 0.12 <sub>b,B</sub> | 9.33 ± 0.18 <sub>c,B</sub>     |
| 21                  | 8.71 ± 0.16 <sub>c,A</sub>   | 8.80 ± 0.03 <sub>a,A</sub> | 9.21 ± 0.01 <sub>c,B</sub>     |
| 28                  | 8.32 ± 0.31 <sub>b,c,A</sub> | 8.21 ± 0.39 <sub>a,A</sub> | 9.06 ± 0.06 <sub>b,c,B</sub>   |
| LACTOBACILLUS       |                              |                            |                                |
| Storage time (days) | C                            | LA5                        | LA5FQ4                         |
| 1                   | 5.49 ± 0.02 <sub>a,A</sub>   | 8.27 ± 0.08 <sub>a,B</sub> | 8.89 ± 0.01 <sub>b,C</sub>     |
| 7                   | 5.96 ± 0.20 <sub>a,A</sub>   | 8.33 ± 0.21 <sub>a,B</sub> | 8.21 ± 0.26 <sub>a,B</sub>     |
| 14                  | 7.03 ± 0.38 <sub>b,A</sub>   | 9.36 ± 0.20 <sub>b,B</sub> | 9.19 ± 0.04 <sub>b,B</sub>     |
| 21                  | 7.23 ± 0.53 <sub>b,A</sub>   | 8.44 ± 0.33 <sub>a,B</sub> | 9.19 ± 0.09 <sub>b,C</sub>     |
| 28                  | 8.43 ± 0.62 <sub>d,A</sub>   | 8.48 ± 0.25 <sub>a,A</sub> | 9.18 ± 0.07 <sub>b,B</sub>     |
| YEASTS AND MOULDS   |                              |                            |                                |
| Storage time (days) | C                            | LA5                        | LA5FQ4                         |
| 1                   | 4.75 ± 0.35 <sub>a,A</sub>   | 5.74 ± 0.25 <sub>a,B</sub> | 5.27 ± 0.24 <sub>a,b,A,B</sub> |
| 7                   | 4.10 ± 0.20 <sub>a,A</sub>   | 5.93 ± 0.40 <sub>a,B</sub> | 5.73 ± 0.51 <sub>a,b,B</sub>   |
| 14                  | 6.61 ± 0.44 <sub>b,c,A</sub> | 6.24 ± 0.95 <sub>a,A</sub> | 6.27 ± 0.25 <sub>b,A</sub>     |
| 21                  | 7.46 ± 0.14 <sub>c,B</sub>   | 5.65 ± 0.27 <sub>a,A</sub> | 5.02 ± 1.04 <sub>a,A</sub>     |
| 28                  | 6.48 ± 0.37 <sub>b,B</sub>   | 6.72 ± 0.34 <sub>a,B</sub> | 5.74 ± 0.30 <sub>a,b,A</sub>   |

Different superscript letters (a,b,c,d) indicate differences for the same product in different ripening days. Superscript capital letters (A,B,C) indicate differences between products at the same ripening day.
